# Supplementary material
Source: publisher site journal article supplement (https://www.dovepress.com/article/474338)
Supplement: Supplementary file 1 [file get_supplementary_file.php]

# Supplementary

**Supplementary Table 1.** Cities where the Respiratory Disease Specific Program was conducted

| **Tier** | **City** |
| --- | --- |
| **Tier 1** | Beijing |
| Shanghai |
| Guangzhou (Guangdong province) |
| **Tier 2** | Chengdu (Sichuan province) |
| Wuhan (Hubei province) |
| Xi’an (Shaanxi province) |
| Nanjing (Jiangsu province) |
| Shenyang (Liaoning province) |
| **Tier 3** | Foshan & Jiangmen (Guangdong province) |
| Mianyang & Luzhou (Sichuan province) |
| Nantong & Wuxi (Jiangsu province) |
| **Tier 4** | Qingyuan & Zhaoqing (Guangdong province) |
| Guanghan, Dujiangyan, & Luxin County (Sichuan province) |

**Supplementary Table 2.** Comparison in Step 4/5 treatment recommendations for adult patients between the 2018 and 2022 GINA treatment recommendations1,2

| **Topic** | **2018 GINA**  **Recommendations** | **2022 GINA**  **Recommendations** | | |
| --- | --- | --- | --- | --- |
| **Track 1. Controller and preferred reliever** Using ICS-formoterol as reliever reduces the risk of exacerbations compared with using a SABA reliever | **Track 2. Controller and alternative reliever** Before considering a regimen with SABA reliever, check if the patient is likely to be adherent with daily controller | **Key differences compared with the GINA 2018 Recommendations** |
| **GINA Step 4** | **Controller:** medium/high ICS/LABA. Other controller options include adding tiotropium, med/high dose ICS+LTRA (or +theophylline) **Reliever:** as-needed SABA or low dose ICS/formoterol | **Controller**: Medium dose maintenance ICS-formoterol. **Reliever:** as-needed low-dose ICS-formoterol | **Controller:** Medium/high dose maintenance ICS/LABA **Reliever:** as-needed SABA | - Treatment options were shown in two tracks, with as-needed low-dose ICS-formoterol as the preferred reliever - LAMA was included as an add-on to ICS-based therapy in Steps 4 and 5 - Anti-IL4R and anti-TSLP were also included as biologic therapies in Step 5 - Maintenance OCS should be considered only as last resort |
| - Short course OCS may also be needed for patients presenting with severely uncontrolled asthma - Other controller options for either track: add LAMA or LTRA or HDM SLIT, or switch to high dose ICS | |
| **GINA Step 5** | **Controller:** Refer for add-on treatment, e.g., tiotropium, anti-IgE, anti-IL5. Other controller option is adding low dose OCS. **Reliever:** as-needed SABA or low dose ICS/formoterol | **Controller:** Add-on LAMA. Refer for assessment of phenotype. Consider high dose maintenance ICS-formoterol, ± anti-IgE, anti-IL5/5R, anti-IL4R, anti-TSLP **Reliever:** as-needed low-dose ICS-formoterol | **Controller:** Add-on LAMA. Refer for assessment of phenotype. Consider high dose maintenance ICS/LABA, ± anti-IgE, anti-IL5/5R, anti-IL4R, anti-TSLP  **Reliever:** as-needed SABA |
| Other controller options for either track: add azithromycin (adults) or LTRA. As last resort, consider adding low dose OCS but consider side effects | |
| **Severe asthma** | Asthma that requires Step 4 or 5 treatment, e.g., high-dose ICS/LABA, to prevent it from becoming 'uncontrolled', or asthma that remains 'uncontrolled' despite this treatment | Asthma that is uncontrolled despite adherence with maximal optimised high dose ICS/LABA treatment and management of contributory factors, or that worsens when high dose treatment is decreased | | - Asthma that requires medium-dose ICS/LABA was no longer considered as severe asthma - Prior to severity classification, management of contributory factors was required |

Footnote: The current Chinese asthma guidelines (2020 edition)3 remain more aligned with the 2018 GINA recommendations than with the GINA recommendations from 2021 onwards due to significant changes the GINA recommendations underwent in 2021. This ensures the continued relevance of clinical practice from 2018 in the current management of severe asthma in China.
Abbreviations: GINA, Global Initiative for Asthma; HDM, house dust mite; ICS, inhaled corticosteroid; IgE, immunoglobulin E; IL, interleukin; LABA, long-acting beta-agonist; LAMA, long-acting muscarinic antagonist; LTRA, leukotriene receptor antagonist; OCS, oral corticosteroid; SABA, short-acting beta-agonist; SLIT, sublingual immunotherapy; TSLP, thymic stromal lymphopoietin.

**Supplementary Table 3.** Low, medium and high daily doses of inhaled corticosteroids defined by the 2018 GINA treatment recommendations2

| **Drug** | **Daily Dose (mcg)** | | |
| --- | --- | --- | --- |
| **Low** | **Medium** | **High** |
| Beclomethasone dipropionate (CFC) | 200–500 | >500–1000 | >1000 |
| Beclomethasone dipropionate (HFA) | 100–200 | >200–400 | >400 |
| Budesonide (DPI) | 200–400 | >400–800 | >800 |
| Ciclesonide (HFA) | 80–160 | >160–320 | >320 |
| Fluticasone furoate (DPI) | 100 | N/A | 200 |
| Fluticasone propionate (DPI) | 100–250 | >250–500 | >500 |
| Fluticasone propionate (HFA) | 100–250 | >250–500 | >500 |
| Mometasone furoate | 110–220 | >220–440 | >440 |
| Triamcinolone acetonide | 400–1000 | >1000–2000 | >2000 |

Abbreviations: CFC: chlorofluorocarbon propellant; DPI: dry powder inhaler; GINA, Global Initiative for Asthma; HFA: hydrofluoroalkane propellant; N/A, not applicable.

**Supplementary Table 4.** Physician-reported exacerbation history in the last 12 months among patients with asthma on GINA Step 4/5 therapies

| Characteristics | BEC taken | | | | BEC not taken  (N=366) | Total  (N=754) |
| --- | --- | --- | --- | --- | --- | --- |
| **BEC<150 cells/µL**  **(N=52)** | **BEC≥150 cells/µL**  **(N=115)** | **BEC unknown**  **(N=221)** | **Subtotal**  **(N=388)** |
| **Exacerbations leading to ER visit, n (%)** | | | |  |  |  |
| 0 exacerbation | 46 (88.5) | 103 (89.6) | 201 (91.0) | 350 (90.2) | 356 (97.3) | 706 (93.6) |
| 1 exacerbation | 6 (11.5) | 7 (6.1) | 20 (9.0) | 33 (8.5) | 9 (2.5) | 42 (5.6) |
| ≥2 exacerbations | 0 | 5 (4.3) | 0 | 5 (1.3) | 1 (0.3) | 6 (0.8) |
| **Exacerbations leading to hospitalization, n (%)** | | | |  |  |  |
| 0 exacerbation | 46 (88.5) | 74 (64.3) | 143 (64.7) | 263 (67.8) | 346 (94.5) | 609 (80.8) |
| 1 exacerbation | 6 (11.5) | 31 (27.0) | 75 (33.9) | 112 (28.9) | 14 (3.8) | 126 (16.7) |
| ≥2 exacerbations | 0 | 10 (8.7) | 3 (1.4) | 13 (3.4) | 6 (1.6) | 19 (2.5) |
| **Exacerbations leading to OCS course, n (%)** | | | |  |  |  |
| 0 exacerbation | 42 (80.8) | 76 (66.1) | 142 (64.3) | 260 (67.0) | 330 (90.2) | 590 (78.2) |
| 1 exacerbation | 7 (13.5) | 30 (26.1) | 70 (31.7) | 107 (27.6) | 25 (6.8) | 132 (17.5) |
| ≥2 exacerbations | 3 (5.8) | 9 (7.8) | 9 (4.1) | 21 (5.4) | 11 (3.0) | 32 (4.2) |

Abbreviation: BEC, blood eosinophil count; ER, emergency room; GINA, Global Initiative for Asthma; OCS, oral corticosteroid.

# References

1. Global Initiative for Asthma. GINA report, global strategy for asthma management and prevention (updated 2022); 2022. Available from: https://ginasthma.org/gina-reports/. Accessed 23 January 2023.
2. Global Initiative for Asthma. GINA report, global strategy for asthma management and prevention (updated 2018); 2018. Available from: [https://ginasthma.org/wp-content/uploads/2019/01/2018-GINA.pdf. Accessed 23 January 2023](https://ginasthma.org/wp-content/uploads/2019/01/2018-GINA.pdf.%20Accessed%2023%20January%202023).
3. Asthma group of Chinese Throacic Society. [Guidelines for bronchial asthma prevent and management (2020 edition) Asthma group of Chinese Throacic Society]. Zhonghua Jie He He Hu Xi Za Zhi. 2020;43(12):1023–1048. doi: 10.3760/cma.j.cn112147-20200618-00721
